# Supplementary material
Source: MDPI journal article supplement (https://www.mdpi.com/2073-4344/9/8/661)
Supplement: s1 [file s1]

# Supplementary Materials: Waste Seashells as a Highly Active Catalyst for Cyclopentanone Self-Aldol Condensation

Xueru Sheng <sup>1,†</sup>, Qianqian Xu <sup>1,†</sup>, Xing Wang <sup>1</sup>, Na Li <sup>1</sup>, Haiyuan Jia <sup>2</sup>, Haiqiang Shi <sup>1</sup>, Meihong Niu <sup>1</sup>, Jian Zhang <sup>1,\*</sup> and Qingwei Ping <sup>1,\*</sup>

<sup>1</sup> College of Light Industry and Chemical Engineering, Dalian Polytechnic University, Dalian, Liaoning 116034, China

<sup>2</sup> Shandong Provincial Key Laboratory of Molecular Engineering, School of Chemistry and Pharmaceutical Engineering, Qilu University of Technology—Shandong Academy of Sciences, No. 3501, Daxue Road, Jinan 250353, China

\* Correspondence: pingqw@dlpu.edu.cn (Q.P.); zhangjian@dlpu.edu.cn (J.Z.); Tel.: +86-411-86323327-601 (Q.P.); +86-411-86323327-603 (J.Z.)

<sup>†</sup> These authors contributed equally to this work.

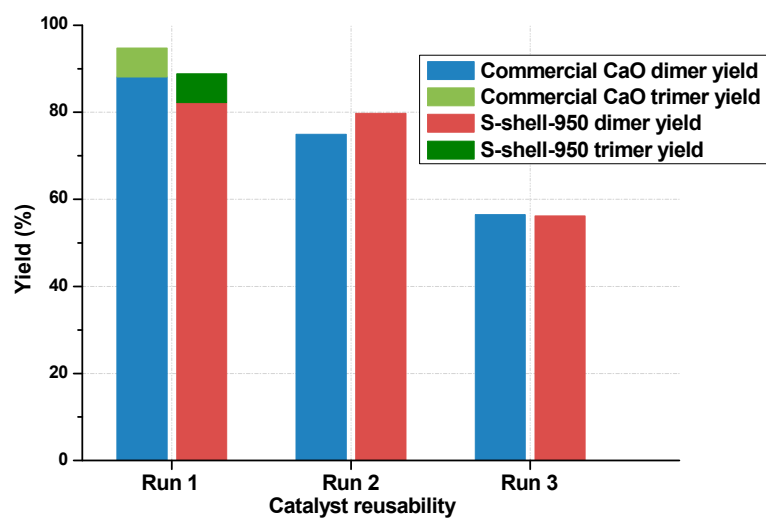

**Figure S1.** Catalyst reusability of commercial CaO and S-shell-950 catalysts. Reaction conditions: 4.0 g cyclopentanone; 1.0 g catalyst; 180 °C; 2h. Catalysts were regenerated by calcination at 950 °C for 4 h.

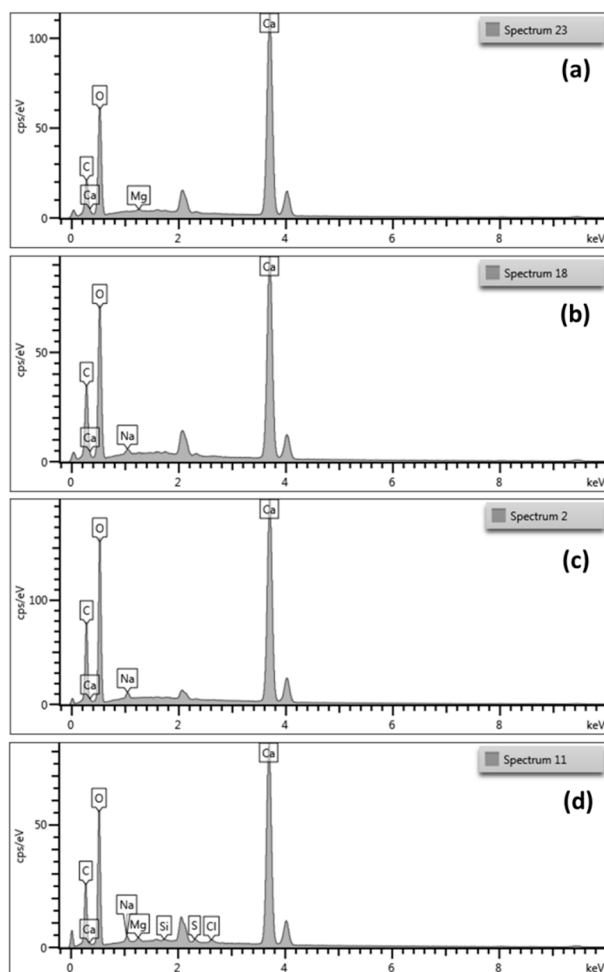

**Figure S2.** SEM-EDS data of catalysts before calcination. (a) commercial CaO; (b) S-shell; (c) C-shell; (d) O-shell.

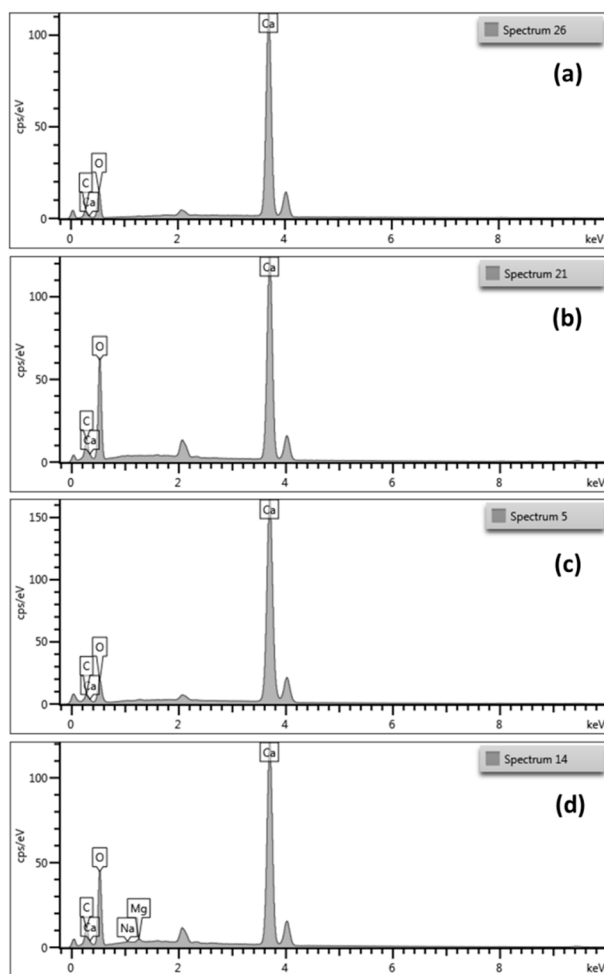

**Figure S3.** SEM-EDS data of catalysts after calcination at 950 °C. (a) commercial CaO; (b) S-shell-950; (c) C-shell-950; (d) O-shell-950.
